# Supplementary material
Source: HighWire-hosted journal article supplement (https://www.cmajopen.ca/highwire/filestream/80960/field_highwire_adjunct_files/3/2016-0068_Reviewer_comments.pdf)
Supplement: 2016-0068_Reviewer_comments.pdf [file 2016-0068_Reviewer_comments.pdf]

| Article details: 2016-0068                 |                                                                                                                                                                                                                                                                                                                                                                                                                                                                                                                                                                                                                                                                                                                                                                                                                                                                                                                                                                                                                                                                                                                                                                                                                                                                                                                                                                                                                                                                                                                                                                                                                                                                                                                                                                                                                                                                                                                                                                                                                                                                                                                                                                                                                                                                                                                                                                                                                                                                                                                                                                                                                                                                                                                                                                                                                                                                                                                                                                                                                                                                                                                                                                                                                                                                                                                                                                                                                                                                                                                                 |
|--------------------------------------------|---------------------------------------------------------------------------------------------------------------------------------------------------------------------------------------------------------------------------------------------------------------------------------------------------------------------------------------------------------------------------------------------------------------------------------------------------------------------------------------------------------------------------------------------------------------------------------------------------------------------------------------------------------------------------------------------------------------------------------------------------------------------------------------------------------------------------------------------------------------------------------------------------------------------------------------------------------------------------------------------------------------------------------------------------------------------------------------------------------------------------------------------------------------------------------------------------------------------------------------------------------------------------------------------------------------------------------------------------------------------------------------------------------------------------------------------------------------------------------------------------------------------------------------------------------------------------------------------------------------------------------------------------------------------------------------------------------------------------------------------------------------------------------------------------------------------------------------------------------------------------------------------------------------------------------------------------------------------------------------------------------------------------------------------------------------------------------------------------------------------------------------------------------------------------------------------------------------------------------------------------------------------------------------------------------------------------------------------------------------------------------------------------------------------------------------------------------------------------------------------------------------------------------------------------------------------------------------------------------------------------------------------------------------------------------------------------------------------------------------------------------------------------------------------------------------------------------------------------------------------------------------------------------------------------------------------------------------------------------------------------------------------------------------------------------------------------------------------------------------------------------------------------------------------------------------------------------------------------------------------------------------------------------------------------------------------------------------------------------------------------------------------------------------------------------------------------------------------------------------------------------------------------------|
| Title                                      | Residents of highly walkable neighbourhoods do substantially more physical activity: A cross-sectional analysis of walkability and objectively-measured physical activity in Canadian urban areas                                                                                                                                                                                                                                                                                                                                                                                                                                                                                                                                                                                                                                                                                                                                                                                                                                                                                                                                                                                                                                                                                                                                                                                                                                                                                                                                                                                                                                                                                                                                                                                                                                                                                                                                                                                                                                                                                                                                                                                                                                                                                                                                                                                                                                                                                                                                                                                                                                                                                                                                                                                                                                                                                                                                                                                                                                                                                                                                                                                                                                                                                                                                                                                                                                                                                                                               |
| Authors                                    | Justin Thielman MSc, Heather Manson MD MHSc, Maria Chiu PhD, Ray Copes MD MSc, Laura Rosella PhD                                                                                                                                                                                                                                                                                                                                                                                                                                                                                                                                                                                                                                                                                                                                                                                                                                                                                                                                                                                                                                                                                                                                                                                                                                                                                                                                                                                                                                                                                                                                                                                                                                                                                                                                                                                                                                                                                                                                                                                                                                                                                                                                                                                                                                                                                                                                                                                                                                                                                                                                                                                                                                                                                                                                                                                                                                                                                                                                                                                                                                                                                                                                                                                                                                                                                                                                                                                                                                |
| Reviewer 1                                 | Not available                                                                                                                                                                                                                                                                                                                                                                                                                                                                                                                                                                                                                                                                                                                                                                                                                                                                                                                                                                                                                                                                                                                                                                                                                                                                                                                                                                                                                                                                                                                                                                                                                                                                                                                                                                                                                                                                                                                                                                                                                                                                                                                                                                                                                                                                                                                                                                                                                                                                                                                                                                                                                                                                                                                                                                                                                                                                                                                                                                                                                                                                                                                                                                                                                                                                                                                                                                                                                                                                                                                   |
| Institution                                | Not available                                                                                                                                                                                                                                                                                                                                                                                                                                                                                                                                                                                                                                                                                                                                                                                                                                                                                                                                                                                                                                                                                                                                                                                                                                                                                                                                                                                                                                                                                                                                                                                                                                                                                                                                                                                                                                                                                                                                                                                                                                                                                                                                                                                                                                                                                                                                                                                                                                                                                                                                                                                                                                                                                                                                                                                                                                                                                                                                                                                                                                                                                                                                                                                                                                                                                                                                                                                                                                                                                                                   |
| General comments (author response in bold) | Not available                                                                                                                                                                                                                                                                                                                                                                                                                                                                                                                                                                                                                                                                                                                                                                                                                                                                                                                                                                                                                                                                                                                                                                                                                                                                                                                                                                                                                                                                                                                                                                                                                                                                                                                                                                                                                                                                                                                                                                                                                                                                                                                                                                                                                                                                                                                                                                                                                                                                                                                                                                                                                                                                                                                                                                                                                                                                                                                                                                                                                                                                                                                                                                                                                                                                                                                                                                                                                                                                                                                   |
| Reviewer 2                                 | Prof. Mark Hamer                                                                                                                                                                                                                                                                                                                                                                                                                                                                                                                                                                                                                                                                                                                                                                                                                                                                                                                                                                                                                                                                                                                                                                                                                                                                                                                                                                                                                                                                                                                                                                                                                                                                                                                                                                                                                                                                                                                                                                                                                                                                                                                                                                                                                                                                                                                                                                                                                                                                                                                                                                                                                                                                                                                                                                                                                                                                                                                                                                                                                                                                                                                                                                                                                                                                                                                                                                                                                                                                                                                |
| Institution                                | University College London, London, UK                                                                                                                                                                                                                                                                                                                                                                                                                                                                                                                                                                                                                                                                                                                                                                                                                                                                                                                                                                                                                                                                                                                                                                                                                                                                                                                                                                                                                                                                                                                                                                                                                                                                                                                                                                                                                                                                                                                                                                                                                                                                                                                                                                                                                                                                                                                                                                                                                                                                                                                                                                                                                                                                                                                                                                                                                                                                                                                                                                                                                                                                                                                                                                                                                                                                                                                                                                                                                                                                                           |
| General comments (author response in bold) | <p>This paper examines associations between walkability and objective MVPA from a subsample of CHMS. The study finds that adults in the highest quintiles record around 15 min/d more MVPA .</p> <p>Main comments:</p> <p>The key aspect of this paper is in employing objective assessments of MVPA . However this method has its own limitations that have not been acknowledged. For example a 10 hour wear protocol captures incomplete portions of waking hours and many contemporary studies are now moving to 24hr accelerometry wear protocols. In addition the protocol for identifying non-wear was unclear. It is common to identify non wear as a continuous 60 min period of zero counts. Lastly , the short wear period of up to a week may not represent habitual pattern of activity.</p> <ul style="list-style-type: none"> <li><input type="checkbox"/> <b>To address the limitations raised, we have added the following text to the limitations section of the manuscript: "Furthermore, the 4-7 day wear period may not be representative of typical activity levels for some people, and the minimum 10-hour wear protocol may have missed important activity information; again, these differences are likely non-differential across quintiles" (line 269-272).</b></li> <li><input type="checkbox"/> <b>We have also added the following point of clarification to the methods section: "Non-wear time was considered to be 60+ consecutive minutes with zero counts (allowing 1-2 minutes of counts between 0-100)" (line 98-99).</b></li> </ul> <p>The models are lacking important covariates. For example , participants will accrue MVPA during structured sports and exercise regardless of neighborhood walkability. In addition chronic health conditions , obesity, and smoking will limit MVPA .</p> <ul style="list-style-type: none"> <li><input type="checkbox"/> <b>Thank you for raising this point. The cluster sampling design of the Canadian Health Measures Survey results in a limited number of degrees of freedom in statistical models. Therefore, despite the large sample size, we were limited in the number of covariates we could include in our adjusted models. We aimed to include the most important covariates based on previous research and have clarified this with the following revision to text in the methods section: "Covariate-adjusted models for respondents overall included the following variables, anticipated to be the most important confounders based on previous research" (line 121-124).</b></li> </ul> <p>The data presented in table 1 could be better described. For example, there is an intriguing inverse association between income and walkability. This seems quite paradoxical and deserves some discussion . I.e., it is common to see social patterning of physical activity ( higher activity in more wealthy).</p> <ul style="list-style-type: none"> <li><input type="checkbox"/> <b>Thank you for the suggestion. While there are some interesting differences in other covariates across Walk Score quintiles, we do not go into detail describing these in the text because the focus of this paper is on differences in physical activity.</b></li> </ul> <p>The paper describes some important caveats in the limitations . I agree that neighborhood safety is a crucial variable not captured in the walkability index. Taken together, at present it is difficult to evaluate the true significance of these data.</p> |
